# Supplementary material for: Longer Sperm Swim More Slowly in the Canary Islands Chiffchaff
Source: MDPI journal article supplement (doi:10.3390/cells10061358), 2021-05-31
Supplement: s1 [file s1]

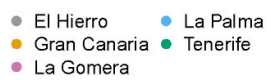

Figure S1: Minimum spanning network of Canary Islands chiffchaffs COI sequences, combining this study with data from Illera et al. [51]. Color indicates the island where the individual was captured. The sizes of the circles are proportional to the haplotype frequencies (smallest circle = 1 individual; count data are in Table S3). Numbers of mutational steps are indicated along the lines connecting haplotypes. Haplogroup numbering corresponds to numbering in tables S1-S3.
